# Supplementary material for: Berberine Ameliorates Neuroinflammation by cGAS-STING-NLRP3 Axis in Cerebral Ischemia/Reperfusion Injury
Source: Research Square preprint supplement (doi:10.21203/rs.3.rs-8593386/v1), 2026-01-28
Supplement: Supplementary file 1 [file a459343ded73c7ac809cd65e.docx]

**Supplementary data**


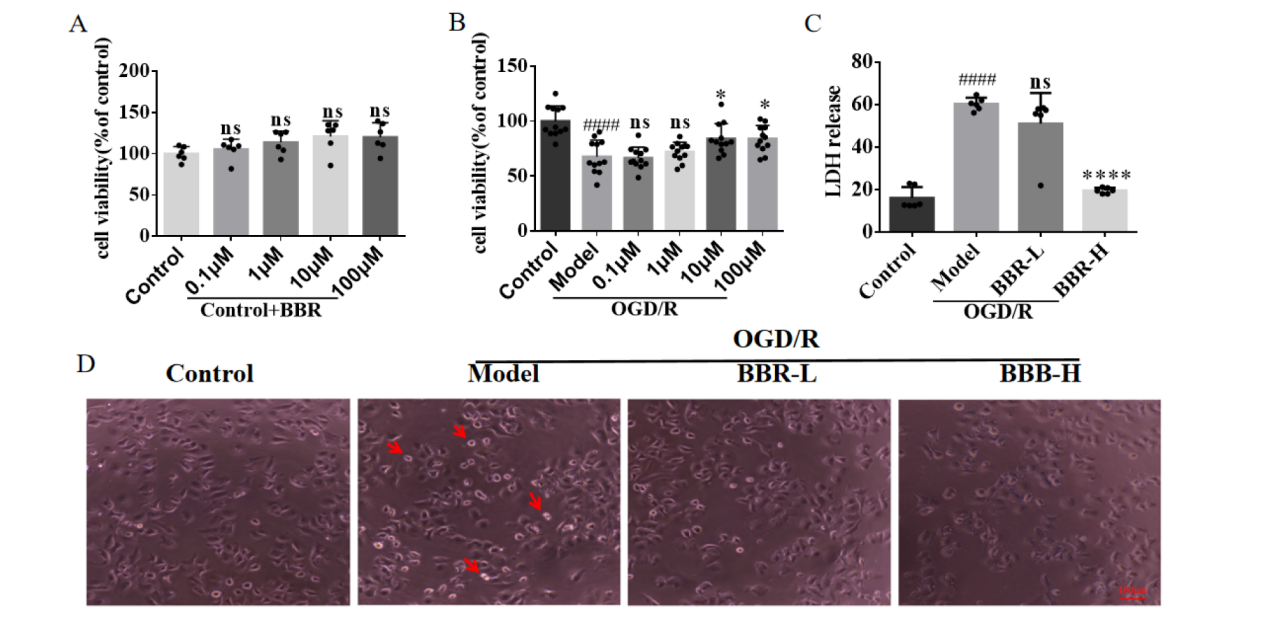


Figure S1: BBR demonstrated notable neuroprotective benefits within the SH-SY5Y culture simulate caused by OGD/R. (A) Result from the CCK-8 assay demonstrating how BBR affects SH-SY5Y cells' capacity to survive at various doses in the normal group. (B) The findings of the CCK-8 assay demonstrating the cell survival of several SH-SY5Y cell groups using the chosen BBR testing circumstances. (C) LDH release from different groups of SH-SY5Y cells after BBR treatment. (D) Features about SH-SY5Y cells' morphology as seen via a microscope using a 100 μm scale bar.compared with Control group ####p<0.0001; compared with OGD/R group, *p<0.05,****p<0.0001.ns represents p > 0.05.
